# Supplementary material for: Medicinal Cannabis for Inflammatory Bowel Disease: A Survey of Perspectives, Experiences, and Current Use in Australian Patients
Source: PubMed Central journal article supplement (PMC9802391; doi:10.1093/crocol/otaa015), 2020-04-16
Supplement: otaa015_suppl_supplementary_figure_s1.pdf [file otaa015_suppl_supplementary_figure_s1.pdf]

## Supplementary Figure 1

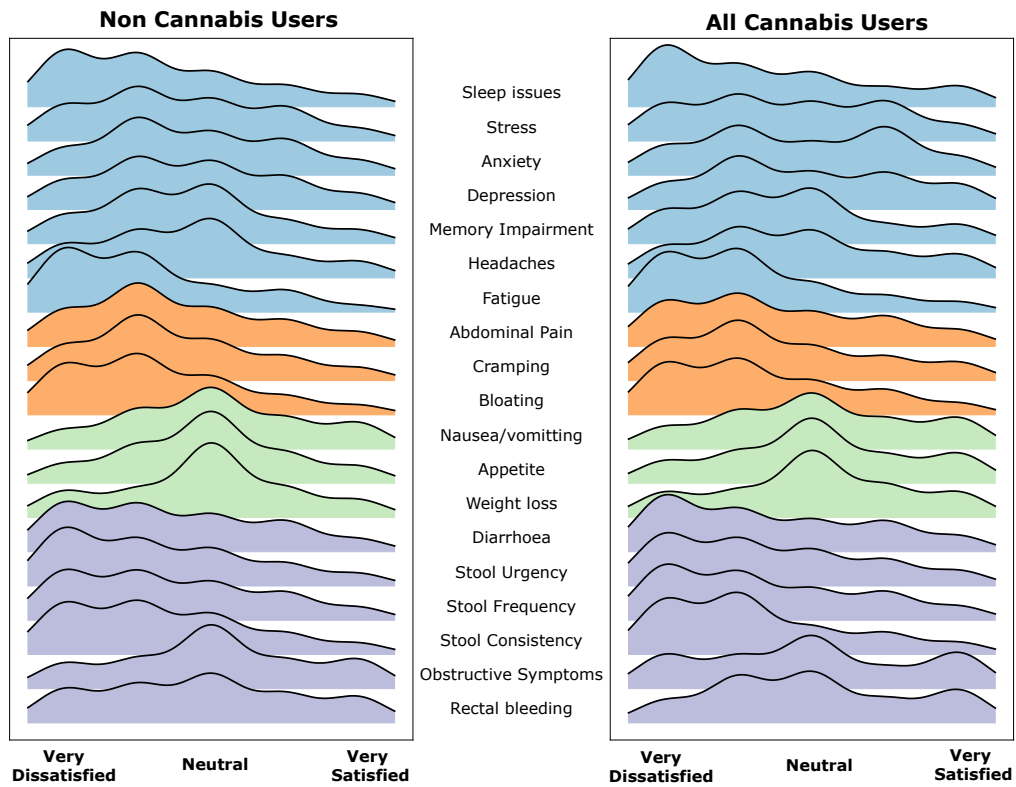

**Supplementary Figure 1.** Current symptom management satisfaction as reported by users (current and previous combined) and non-users. Respondent's overall satisfaction with symptom management was not different between cannabis use groups ( $\chi^2(4, 2.587)$   $p=0.62$ ). Cannabis user respondents,  $n=205$ ; non-user respondents,  $n=603$ .
