# Supplementary material for: Medicinal Cannabis for Inflammatory Bowel Disease: A Survey of Perspectives, Experiences, and Current Use in Australian Patients
Source: PubMed Central journal article supplement (PMC9802391; doi:10.1093/crocol/otaa015), 2020-04-16
Supplement: otaa015_suppl_supplementary_figure_s2.pdf [file otaa015_suppl_supplementary_figure_s2.pdf]

## Supplementary Figure 2

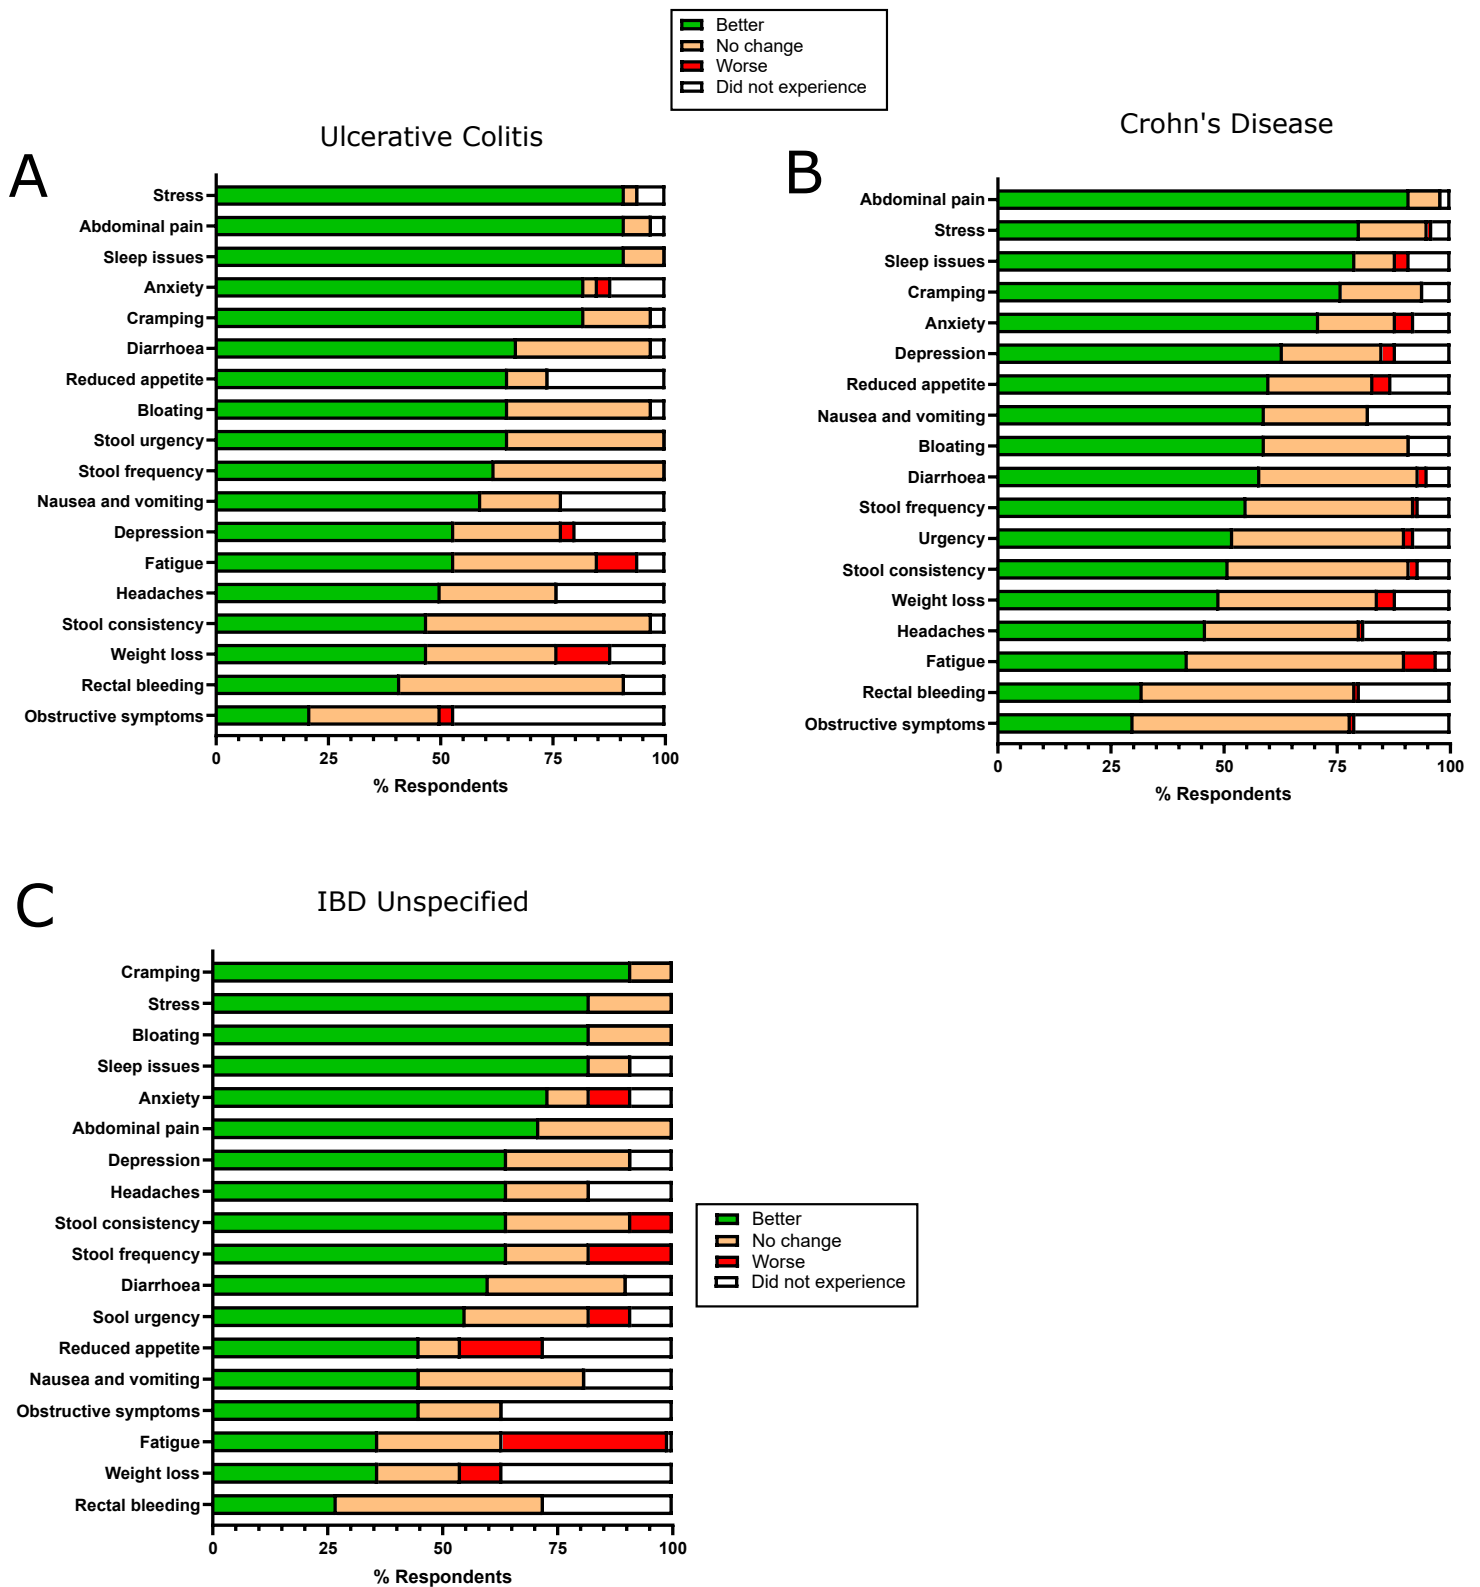

**Supplementary Figure 2.** Self-reported IBD symptom change with medicinal cannabis use in current and previous users listed by greatest positive benefit to least broken down by IBD type; **A.** Ulcerative colitis, **B.** Crohn's disease, **C.** IBD Unspecified. Green = positive change; orange = no change; red = negative change; white = did not report having this symptom.
